## Editorial Board

### EDITORS-IN-CHIEF

**Jeff Schinske**  
Foothill College  
schinskejeff@fnda.edu

**Kimberly Tanner**  
San Francisco State University  
kdtanner@sfsu.edu

### SENIOR EDITORS

**Daron Barnard**  
Worcester State University  
daron.barnard@worcester.edu

**Cynthia Bauerle**  
James Madison University  
bauerlcm@jmu.edu

**Erin L. Dolan**  
University of Georgia  
eldolan@uga.edu

### EDITORS

**Joel K. Abraham**  
California State University, Fullerton  
jkabraham@fullerton.edu

**Bruce Alberts**  
University of California, San Francisco  
balberts@ucsf.edu

**Tessa C. Andrews**  
University of Georgia  
tandrews@uga.edu

**Mark Barsoum**  
Davidson College  
mabarsoum@davidson.edu

**Molly Bolger**  
University of Arizona  
mbolger@email.arizona.edu

**Jana Bouwma-Gearhart**  
Oregon State University  
Jana.Bouwma-Gearhart@oregonstate.edu

**Cynthia Brame**  
Vanderbilt University  
cynthia.brame@vanderbilt.edu

**Derek Braun**  
Gallaudet University  
derek.braun@gallaudet.edu

**Clark Coffman**  
Iowa State University  
coffman@iastate.edu

**John Coley**  
Northeastern University  
j.coley@neu.edu

**Lisa Corwin**  
University of Colorado  
lisa.corwin@Colorado.edu

**Sehoya Cotner**  
University of Minnesota  
sehoya@umn.edu

**Brian Couch**  
University of Nebraska  
bcouch2@unl.edu

**Sarah L. Eddy**  
Florida International University  
seddy@fiu.edu

**David Feldon**  
Utah State University  
david.feldon@usu.edu

**Kyle Frantz**  
Georgia State University  
kfrantz@gsu.edu

**Grant Ean Gardner**  
Middle Tennessee State University  
Grant.Gardner@mtsu.edu

**Stephanie Gardner**  
Purdue University  
sgardne@purdue.edu

**Julia Gouvea**  
Tufts  
Julia.Gouvea@tufts.edu

**James Hewlett**  
Finger Lakes Community College  
hewletja@flcc.edu

**Jennifer Knight**  
University of Colorado, Boulder  
jennifer.knight@colorado.edu

**Paula Lemons**  
University of Georgia  
plemons@uga.edu

**Stanley M. Lo**  
University of California San Diego  
smlo@ucsd.edu

**Jennifer Loertscher**  
Seattle University  
loertscher@seattleu.edu

**Tammy Long**  
Michigan State University  
longta@msu.edu

**Gili Marbach-Ad**  
University of Maryland  
gilim@umd.edu

**Jenny McFarland**  
Emeritus, Edmonds College  
jmfarla@email.edcc.edu

**Emily Miller**  
Association of American Universities  
emily.miller@aau.edu

**Jennifer Momsen**  
North Dakota State University  
Jennifer.Momsen@ndsu.edu

**Terrell Morton**  
University of Missouri  
mortontr@missouri.edu

**Ross Nehm**  
Stony Brook University  
ross.nehm@stonybrook.edu

**Erika Offerdahl**  
Washington State University  
erika.offerdahl@wsu.edu

**Luanna Prevost**  
University of South Florida  
prevost@usf.edu

**Rebecca Price**  
University of Washington Bothell  
beccap@uw.edu

**William Romine**  
Wright State University  
william.romine@wright.edu

**Tati Russo-Tait**  
University of Texas  
tatiane@utexas.edu

**Brian Sato**  
UC Irvine  
bsato@uci.edu

**Anita Schuchardt**  
University of Minnesota Twin Cities  
aschucha@umn.edu

**Elisabeth Schussler**  
University of Tennessee Knoxville  
eschuss@utk.edu

**Starlette Sharp**  
Penn State University  
sharp46tusk@yahoo.com

**Erin Shortlidge**  
Portland State University  
eshortlidge@pdx.edu

**Rachelle Spell**  
Emory University  
rspell@emory.edu

**Vicente Talanquer**  
University of Arizona  
vicente@arizona.edu

**Abdi Warfa**  
University of Minnesota  
awarfa@umn.edu

**Carl Wieman**  
Stanford University  
cwieman@stanford.edu

**Kristy Jean Wilson**  
Marian University  
kjwilson@marian.edu

**Adele Wolfson**  
Wellesley College  
awolfson@wellesley.edu

### PUBLISHER

**Thea Clarke**  
**Kevin M. Wilson**  
Co-Interim Chief Executive Officers

**W. Mark Leader**  
ASCB Publications Director

**Thea Clarke**  
ASCB Director of Communications  
and Education

**Eric T. Baker**  
ASCB Journals Manager

Published by

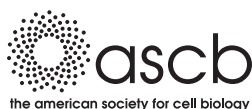

Editorial Partner

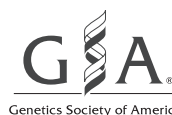

CBE—Life Sciences Education (ISSN 1931-7913) is published online quarterly (one volume per year) by The American Society for Cell Biology, 6120 Executive Boulevard, Suite 750, Rockville, MD 20852, USA; www.ascb.org. The journal, which is accessible at www.lifescied.org and www.pubmedcentral.nih.gov, is supported in part by a grant from the Howard Hughes Medical Institute. “ASCB,” “The American Society for Cell Biology,” “BioSeminars,” and “Molecular Biology of the Cell” are registered trademarks of The American Society for Cell Biology. “The Cell: An Image Library” is a common law trademark of The American Society for Cell Biology.

Owned and published by The American Society for Cell Biology, Erika C. Shugart, *Chief Executive Officer*
